# Supplementary material
Source: PubMed Central journal article supplement (PMC3033593)
Supplement: neo1302_0145SD1.pdf [file neo1302_0145SD1.pdf]

**Table W1.** Suppressed Gene Sets That Overlap with the Genes That Suppressed with ET-743 Treatment in ESFT Cells.

| Name                                      | Size | NOM, <i>P</i> | FDR, <i>q</i> |
|-------------------------------------------|------|---------------|---------------|
| UVC_XPCS_ALL_DN                           | 478  | <.001         | 0.0000        |
| UVC_XPCS_8HR_DN                           | 408  | <.001         | 0.0000        |
| DIAB_NEPH_DN                              | 374  | <.001         | 0.0155        |
| UVC_TTD_ALL_DN                            | 358  | <.001         | 0.0000        |
| HSC_MATURE_ADULT                          | 331  | <.001         | 0.0238        |
| UVC_TTD_4HR_DN                            | 297  | <.001         | 0.0000        |
| UVB_NHEK1_DN                              | 270  | <.001         | 0.0000        |
| ET743_SARCOMA_DN                          | 269  | <.001         | 0.0271        |
| UVC_XPCS_4HR_DN                           | 242  | <.001         | 0.0000        |
| BAF57_BT549_UP                            | 238  | <.001         | 0.0002        |
| HDACL_COLON_SUL_DN                        | 215  | <.001         | 0.0202        |
| VENTRICLES_UP                             | 205  | <.001         | 0.0258        |
| HSA04810_REGULATION_OF_ACTIN_CYTOSKELETON | 198  | <.001         | 0.0315        |
| HSA04510_FOCAL_ADHESION                   | 194  | <.001         | 0.0100        |
| GH_GHRHR_KO_24HRS_DN                      | 172  | <.001         | 0.0050        |
| UVC_TTD_8HR_DN                            | 165  | <.001         | 0.0000        |
| OLD_FIBRO_DN                              | 158  | <.001         | 0.0202        |
| BRCA_BRCA1_NEG                            | 154  | <.001         | 0.0218        |
| UVC_TTD_XPCS_COMMON_DN                    | 144  | <.001         | 0.0000        |
| BRENTANI_PROTEIN_MODIFICATION             | 143  | <.001         | 0.0104        |
| GH_GHRHR_KO_24HRS_UP                      | 142  | <.001         | 0.0199        |
| CALCIUM_REGULATION_IN_CARDIAC_CELLS       | 140  | <.001         | 0.0318        |
| HSA04530_TIGHT_JUNCTION                   | 132  | <.001         | 0.0063        |
| UVB_NHEK1_C6                              | 130  | <.001         | 0.0000        |
| HSA04360_AXON_GUIDANCE                    | 128  | <.001         | 0.0038        |
| GH_AUTOCRINE_DN                           | 122  | <.001         | 0.0039        |
| HSA01030_GLYCAN_STRUCTURES_BIOSYNTHESIS_1 | 111  | <.001         | 0.0362        |
| G_PROTEIN_SIGNALING                       | 90   | <.001         | 0.0070        |
| PHOSPHATIDYLINOSITOL_SIGNALING_SYSTEM     | 88   | <.001         | 0.0002        |
| BRCA1KO_MEF_DN                            | 79   | <.001         | 0.0209        |
| ST_INTEGRIN_SIGNALING_PATHWAY             | 78   | <.001         | 0.0054        |
| CREB_BRAIN_8WKS_UP                        | 75   | <.001         | 0.0042        |
| HSA04520_ADHERENS_JUNCTION                | 75   | <.001         | 0.0157        |
| HSA04664_FC_EPSILON_RI_SIGNALING_PATHWAY  | 74   | <.001         | 0.0283        |
| CARIES_PULP_DN                            | 70   | <.001         | 0.0299        |
| HSA04720_LONG_TERM_POTENTIATION           | 69   | <.001         | 0.0052        |
| UVB_NHEK3_C8                              | 66   | <.001         | 0.0002        |
| UVC_LOW_ALL_DN                            | 58   | <.001         | 0.0000        |
| OLDONLY_FIBRO_DN                          | 53   | <.001         | 0.0092        |
| NFATPATHWAY                               | 52   | <.001         | 0.0006        |
| HDACL_COLON_CUR_DN                        | 49   | <.001         | 0.0002        |
| ET743PT650_COLONCA_DN                     | 44   | <.001         | 0.0000        |
| NOVA2_KO_SPLICING                         | 42   | <.001         | 0.0019        |
| CMV_HCMV_TIMECOURSE_14HRS_DN              | 41   | <.001         | 0.0089        |
| BIOPEPTIDSPATHWAY                         | 38   | <.001         | 0.0002        |
| DFOSB_BRAIN_2WKS_UP                       | 38   | <.001         | 0.0010        |
| UVB_NHEK3_C5                              | 35   | <.001         | 0.0000        |
| AT1RPATHWAY                               | 34   | <.001         | 0.0068        |
| GLYCOGEN_METABOLISM                       | 34   | <.001         | 0.0159        |
| HSA00970_AMINOACYL_TRNA_BIOSYNTHESIS      | 31   | <.001         | 0.0071        |
| HDACPATHWAY                               | 30   | <.001         | 0.0002        |
| CREBPATHWAY                               | 27   | <.001         | 0.0007        |
| HDACL_COLON_CUR24HRS_DN                   | 25   | <.001         | 0.0069        |

The microarray data generated by treating TC32 and TC71 with ET-743 was compared with more than 1892 curated gene sets using GSEA [36]. All had  $P < .001$  and  $FDR < 0.05$ .

The source of the data can be found on the Web site (<http://www.broad.mit.edu/gsea/>) and is referenced in the text where appropriate.

Shaded data indicate data sets discussed in the text.

Size indicates the number of genes in the gene set that shows overlap with the ones in the expression data set.

**Table W2.** Induced Gene Sets That Showed Significant Overlap.

| Name                             | Size | NOM, <i>P</i> | FDR, <i>q</i> |
|----------------------------------|------|---------------|---------------|
| CMV_HCMV_TIMECOURSE_ALL_UP       | 464  | <.001         | 0.0393        |
| REOVIRUS_HEK293_UP               | 236  | <.001         | 0.0053        |
| CARIES_PULP_UP                   | 205  | <.001         | 0.0085        |
| UVB_NHEK1_UP                     | 173  | <.001         | 0.0006        |
| CMV_UV_HCMV_6HRS_UP              | 120  | <.001         | 0.0054        |
| BLEO_HUMAN_LYMPH_HIGH_24HRS_UP   | 92   | <.001         | 0.0008        |
| LVAD_HEARTFAILURE_UP             | 89   | <.001         | 0.0025        |
| UVB_NHEK3_C0                     | 82   | <.001         | 0.0017        |
| HYPOXIA_REVIEW                   | 81   | <.001         | 0.0125        |
| UVC_TTD_ALL_UP                   | 76   | <.001         | 0.0000        |
| DNMT1_KO_UP                      | 72   | <.001         | 0.0045        |
| APOPTOSIS                        | 67   | <.001         | 0.0248        |
| BRENTANI_TRANSCRIPTION_FACTORS   | 64   | <.001         | 0.0236        |
| UVC_XPCS_ALL_UP                  | 61   | <.001         | 0.0000        |
| UVC_XPCS_8HR_UP                  | 58   | <.001         | 0.0000        |
| UVC_TTD_4HR_UP                   | 58   | <.001         | 0.0020        |
| ET743_HELA_UP                    | 56   | <.001         | 0.0007        |
| CMV_HCMV_6HRS_DN                 | 55   | <.001         | 0.0000        |
| CMV_HCMV_TIMECOURSE_6HRS_DN      | 52   | <.001         | 0.0007        |
| TPA_SENS_LATE_UP                 | 52   | <.001         | 0.0394        |
| CMV_HCMV_TIMECOURSE_14HRS_UP     | 45   | <.001         | 0.0000        |
| ZUCCHI_EPITHELIAL_DN             | 43   | <.001         | 0.0008        |
| TNFALPHA_30MIN_UP                | 42   | <.001         | 0.0065        |
| EGF_HDMEC_UP                     | 42   | <.001         | 0.0066        |
| ADIP_DIFF_CLUSTER2               | 40   | <.001         | 0.0002        |
| HYPOXIA_REG_UP                   | 38   | <.001         | 0.0000        |
| DSRNA_UP                         | 38   | <.001         | 0.0002        |
| IFN_GAMMA_UP                     | 38   | <.001         | 0.0014        |
| STRESS_GENOTOXIC_SPECIFIC_UP     | 34   | <.001         | 0.0045        |
| ST_TUMOR_NECROSIS_FACTOR_PATHWAY | 29   | <.001         | 0.0065        |
| OXSTRESS_BREASTCA_UP             | 29   | <.001         | 0.0071        |
| DAC_BLADDER_UP                   | 28   | <.001         | 0.0046        |
| CMV_UV-CMV_COMMON_HCMV_6HRS_DN   | 27   | <.001         | 0.0064        |
| IFNALPHA_NL_UP                   | 27   | <.001         | 0.0084        |
| CMV_HCMV_6HRS_UP                 | 25   | <.001         | 0.0010        |
| AD12_ANY_DN                      | 25   | <.001         | 0.0034        |
| IDX_TSA_UP_CLUSTER1              | 25   | <.001         | 0.0048        |

The microarray data generated by treating TC32 and TC71 with ET-743 was compared with more than 1892 curated gene sets using GSEA [36]. All had  $P < .001$  and FDR < 0.05.

The source of the data can be found on the Web site (<http://www.broad.mit.edu/gsea/>) and is referenced in the text where appropriate.

Size indicates the number of genes in the gene set that shows overlap with the ones in the expression data set.
